# Supplementary material for: Evolution of Metabolic Phenotypes of Obesity in Coronary Patients after 5 Years of Dietary Intervention: From the CORDIOPREV Study
Source: MDPI journal article supplement (doi:10.3390/nu13114046), 2021-11-12
Supplement: s1 [file s1]

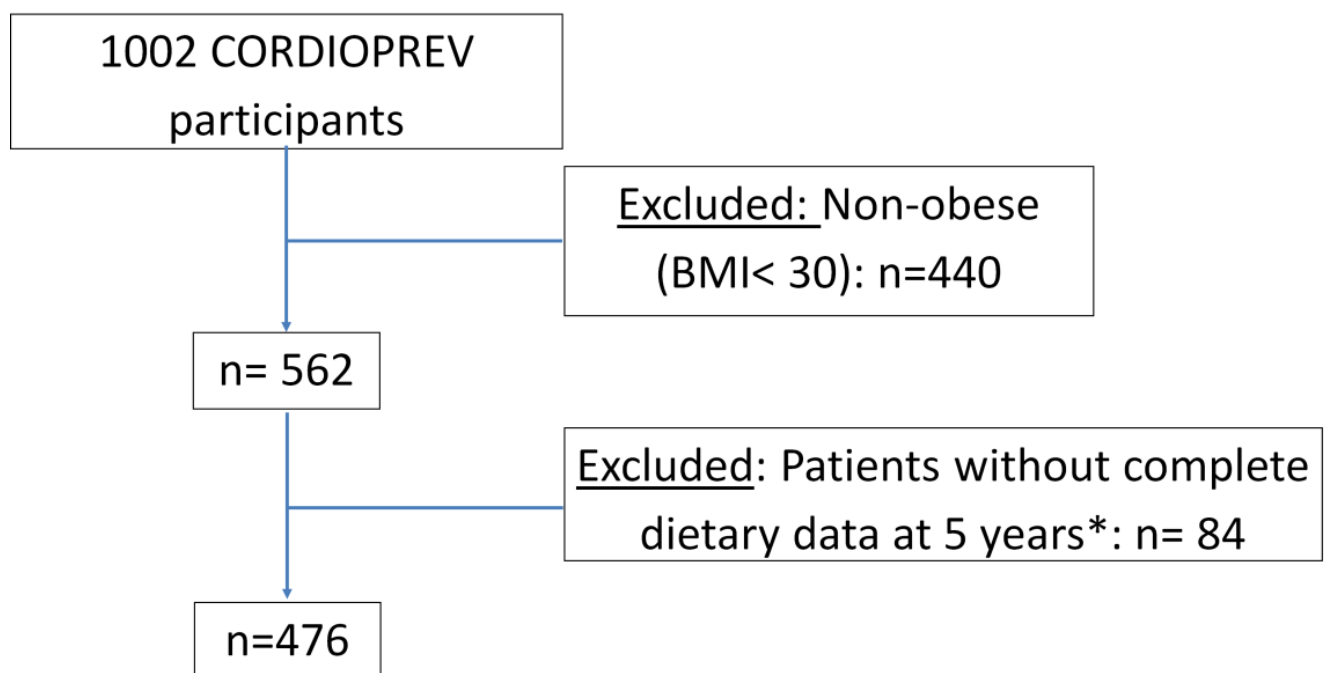

**Supplementary Figure S1:** Flowchart of participants from the CORDIOPREV study included in the present analysis.

\*This value includes those patients who died during the 5-year study, and those who had discontinued the dietary intervention at 5 years.

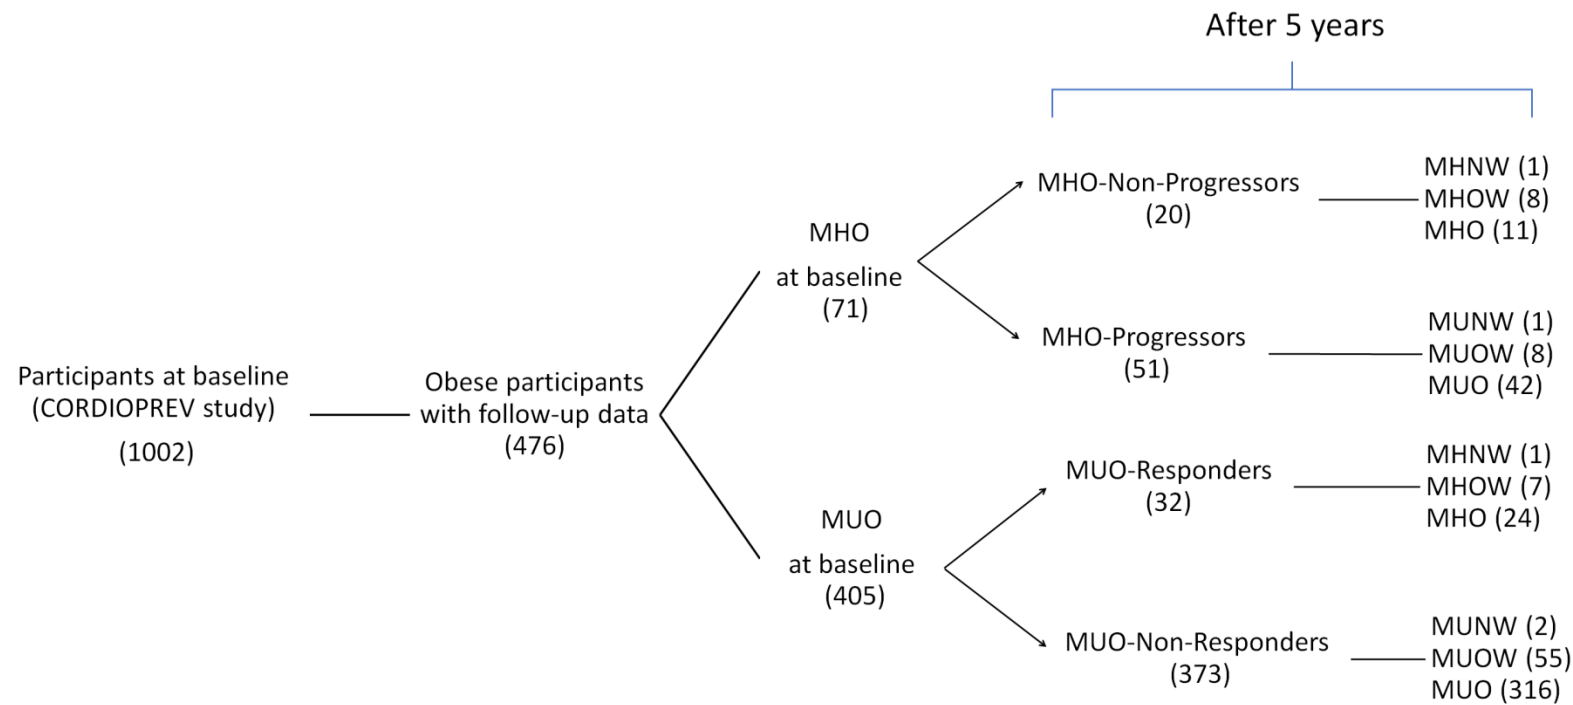

**Supplementary Figure S2:** Evolution of metabolic obesity phenotypes in obese cardiovascular patients after 5-year follow-up.

Obesity phenotypes: MHNL, Metabolically Healthy Normal Weight; MHO, Metabolically Healthy Overweight; MHO, Metabolically Healthy Obese; MUNW, Metabolically Unhealthy Normal Weight; MUOW, Metabolically Unhealthy Overweight; MUO, Metabolically Unhealthy Obese.

**Supplementary Table S1:** Metabolic abnormalities criteria to define metabolic health status (Wildman)(23)

---

1 Elevated blood pressure: systolic/diastolic blood pressure  $\geq 130/85$  mmHg or antihypertensive medication use

2 Elevated triglyceride level: fasting triglyceride level  $\geq 150$  mg/dL

3 Decreased HDL-c level: HDL-c level  $< 40$  mg/dL in men or  $< 50$  mg/dL in women or lipid-lowering medication use

4 Elevated glucose level: fasting glucose level  $\geq 100$  mg/dL or antidiabetic medication use

5 Insulin resistance: HOMA-IR  $> 2.6$

6 Systemic inflammation: hs-CRP level  $\geq 3$  mg/L

---

*HDL-c, High Density Lipoprotein-cholesterol; HOMA-IR, Homeostasis Model Assessment of Insulin Resistance; hs-CRP, high sensitivity C-Reactive Protein*

**Supplementary Table S2:** Differences between values of analyzed variables at 5 years and at 0 years, for the MHO phenotype, according to whether or not they progress to metabolically unhealthy phenotypes, stratified by intervention diet.

|                            | MHO-Non-Progressors (n=20) |                  |                             | MHO-Progressors (n= 51) |                  |                             |
|----------------------------|----------------------------|------------------|-----------------------------|-------------------------|------------------|-----------------------------|
|                            | LFD                        | MD               | p-value*<br>inter<br>groups | LFD                     | MD               | p-value*<br>inter<br>groups |
| <b>Participants, n (%)</b> | <b>8 (40.0)</b>            | <b>12 (60.0)</b> | NS                          | <b>20 (39.2)</b>        | <b>31 (60.8)</b> | NS                          |
| Δ BMI (kg/m <sup>2</sup> ) | -2.4 (1.7)                 | -1.3 (0.6)       | NS                          | -0.1 (0.6)              | -0.7 (0.5)       | NS                          |
| Δ SBP (mmHg)               | 4.0 (9.6)                  | -5.3 (3.6)       | NS                          | 3.7 (4.4)               | 6.5 (3.5)        | NS                          |
| Δ DBP (mmHg)               | 3.8 (3.8)                  | 0.2 (2.6)        | NS                          | 2.1 (2.3)               | 1.5 (2.3)        | NS                          |
| Δ TG (mg/dL)               | -8.6 (11.6)                | -9.6 (8.2)       | NS                          | 19.1 (8.2)              | 6.7 (11.1)       | NS                          |
| Δ HDL-c (mg/dL)            | 0.6 (2.7)                  | -2.0 (1.7)       | NS                          | -7.0 (1.3)†             | -3.4 (1.5)†      | NS                          |
| Δ Glucose (mg/dL)          | 15.4 (7.9)†                | -3.2 (2.8)       | <b>0.019</b>                | 16.5 (6.9)†             | 11.5 (3.3)†      | NS                          |
| Δ Insulin (μIU/mL)         | -1.2 (0.9)                 | -1.6 (1.5)       | NS                          | 2.2 (1.0)†              | 3.5 (0.9)†       | NS                          |
| Δ HOMA IR <sup>a</sup>     | -0.1 (0.2)                 | -0.4 (0.4)       | NS                          | 1.0 (0.4)†              | 1.2 (0.3)†       | NS                          |
| Δ hs-CRP (mg/L)            | -0.8 (0.7)                 | -0.2 (0.2)       | NS                          | 0.5 (0.4)               | 0.4 (0.2)        | NS                          |
| Δ FLI                      | -9.3 (7.5)                 | -11.0 (6.4)      | NS                          | 3.3 (2.9)               | -3.5 (3.7)       | NS                          |
| Δ Metabolic abnormalities  | 0.3 (0.3)                  | 0.2 (0.1)        | NS                          | 2.1 (0.2)†              | 2.0 (0.2)†       | NS                          |

Values indicate differences (Δ) in the analyzed variables, value (5 years) minus value (0 years), for each diet group, expressed as mean ± SEM, or number of participants (%).

\* p<0.05 in comparisons between diet subgroups, using repeated measures ANOVA (time · diet interaction).

† p<0.05 between values of each variable at 0 years and 5 years, using Repeated Measures ANOVA, for each diet subgroup.

<sup>a</sup> HOMA-IR= [Fasting plasma glucose (mmol/L) · Fasting insulin (mIU/L)] /22.5

BMI, Body Mass Index; DBP, Diastolic Blood Pressure; FLI, Fatty Liver Index; HDL-c, High Density Lipoprotein-cholesterol; HOMA-IR, Homeostasis Model Assessment of Insulin Resistance; hs-CRP, high sensitivity C-Reactive Protein; LFD, Low-Fat Diet; MD, Mediterranean Diet; MHO, Metabolically Healthy Obese; SBP, Systolic Blood Pressure; SEM, Standard Error of the Mean.

**Supplementary Table S3:** Differences between values of analyzed variables at 5 years and at 0 years, for the MUO phenotype, according to whether or not they reverse to metabolically healthy phenotypes, stratified by intervention diet.

|                            | MUO-Responders (n=32) |                  |                                         | MUO-Non-Responders (n= 373) |                   |                                         |
|----------------------------|-----------------------|------------------|-----------------------------------------|-----------------------------|-------------------|-----------------------------------------|
|                            | LFD                   | MD               | p-value <sup>*</sup><br>inter<br>groups | LFD                         | MD                | p-value <sup>*</sup><br>inter<br>groups |
| <b>Participants, n (%)</b> | <b>19 (59.4)</b>      | <b>13 (40.6)</b> |                                         | <b>188 (50.4)</b>           | <b>185 (49.6)</b> |                                         |
| Δ BMI (kg/m <sup>2</sup> ) | -2.0 (0.7)†           | -1.8 (0.8)†      | NS                                      | -0.8 (0.2)†                 | -0.1 (0.2)        | <b>0.011</b>                            |
| Δ SBP (mmHg)               | -6.9 (5.0)            | -11.3 (5.4)      | NS                                      | -3.5 (1.4)†                 | 3.6 (1.6)†        | <b>0.001</b>                            |
| Δ DBP (mmHg)               | -5.7 (2.3)            | -1.1 (4.2)       | NS                                      | -3.2 (0.8)†                 | -1.0 (0.9)        | NS                                      |
| Δ TG (mg/dL)               | -40.4 (16.5)†         | -20.4 (9.9)      | NS                                      | -2.1 (5.7)                  | -6.6 (4.9)        | NS                                      |
| Δ HDL-c (mg/dL)            | 1.9 (2.7)             | 1.6 (2.4)        | NS                                      | -1.9 (5.6)†                 | -0.8 (0.6)        | NS                                      |
| Δ Glucose (mg/dL)          | -12.6 (3.0)†          | -15.2 (8.4)†     | NS                                      | 10.0 (3.3)†                 | 3.1 (2.8)         | NS                                      |
| Δ Insulin (μIU/mL)         | -2.5 (1.1)            | -0.5 (1.9)       | NS                                      | 3.5 (0.7)†                  | 4.9 (1.1)†        | NS                                      |
| Δ HOMA IR <sup>a</sup>     | -0.9 (0.3)†           | -0.4 (0.5)       | NS                                      | 1.6 (0.3)†                  | 1.7 (0.4)†        | NS                                      |
| Δ hs-CRP (mg/L)            | -0.7 (0.2)            | -1.2 (0.7)†      | NS                                      | -0.3 (0.2)†                 | -0.4 (0.2)†       | NS                                      |
| Δ FLI                      | -16.3 (5.1)†          | -12.4 (7.4)      | NS                                      | -2.7 (1.0)†                 | -0.4 (0.9)        | NS                                      |
| Δ Metabolic abnormalities  | -1.9 (0.2)†           | -1.9 (0.4)†      | NS                                      | 0.2 (0.1)†                  | 0.3 (0.1)†        | NS                                      |

Values indicate differences (Δ) in the analyzed variables, value (5 years) minus value (0 years), for each diet group, expressed as mean (SEM), or number of participants (percentages).

\* p<0.05 in comparisons between diet subgroups, using repeated measures ANOVA (time · diet interaction).

† p<0.05 between values of each variable at 0 years and 5 years, using Repeated Measures ANOVA, for each diet subgroup.

<sup>a</sup> HOMA-IR= [Fasting plasma glucose (mmol/L) · Fasting insulin (mIU/L)] /22.5

*BMI, Body Mass Index; DBP, Diastolic Blood Pressure; FLI, Fatty Liver Index; HDL-c, High Density Lipoprotein-cholesterol; HOMA-IR, Homeostasis Model Assessment of Insulin Resistance; hs-CRP, high sensitivity C-Reactive Protein; LFD, Low-Fat Diet; MD, Mediterranean Diet; MUO, Metabolically Unhealthy Obese; SBP, Systolic Blood Pressure; SEM, Standard Error of the Mean.*
